# Supplementary material for: High-efficiency ultrathin flexible organic solar cells with a bilayer hole transport layer
Source: Royal Society of Chemistry journal article supplement (doi:10.1039/d4ta01679c), 2024-01-01
Supplement: d4ta01679c1.pdf [file d4ta01679c1.pdf]

## Supporting Information

### High-Efficiency Ultrathin Flexible Organic Solar Cells with a Bilayer Hole Transport Layer

Dongyang Zhang<sup>1</sup>, Yitong Ji<sup>1</sup>, Yingying Cheng<sup>1</sup>, Xiangda Liu<sup>1</sup>, Zezhou Xia<sup>1</sup>, Xiujun Liu<sup>1</sup>, Xiaotong Liu<sup>1</sup>, Xueyuan Yang<sup>1</sup>, Wenchao Huang<sup>1\*</sup>

Key state Laboratory of Advanced Technology for Materials Synthesis and Processing,  
School of Materials Science and Engineering, Wuhan University of Technology,  
430070, Wuhan, China

Corresponding E-mail: [wenchao.huang@whut.edu.cn](mailto:wenchao.huang@whut.edu.cn)

## Experimental details

**Materials:** PM6, L8-BO, and PDINN were purchased from Solarmer Materials Inc, Beijing. Poly(3,4-ethylene dioxythiophene): poly(styrenesulfonate) (PEDOT:PSS) aqueous solution (Clevios PVP 4083) was purchased from Heraeus, Germany. All other chemicals were purchased from Aladdin and used without further purification.

**Ultrathin Device Fabrication:** The ultrathin OSCs were fabricated with a structure of parylene/ITO/MoO<sub>3</sub>/PEDOT:PSS/PM6:L8-BO/PDINN/Ag. First, the fluorinated polymer layer (Novec 1700:7100) was spin-coated on the pre-cleaned glass substrates at 4000 rpm for 1 min. Then, ultrathin parylene film was subsequently deposited on the fluoropolymer-coated glass substrates using chemical vapor deposition. A 180 nm indium tin oxide (ITO) film was sputtered and patterned using a mask, with a sheet resistance of 28 Ohm/sq. Then, MoO<sub>3</sub> was thermally deposited at a vacuum pressure of  $\sim 1 \times 10^{-4}$  Pa. Next, PEDOT:PSS was spin-coated at 5000 rpm for 40 s and annealed on a hot stage in the air at 150 °C for 15 min. The PM6:L8-BO solution (1:1.2 by weight and total concentration of 16 mg/mL in chloroform with 0.5% 1,8-diiodooctane (DIO, v/v) additive) was stirred at 45 °C for 2 h before spin-coated at a speed of 4000 rpm for 30 s. The active layer thickness is around 110 nm. The active layers were annealed at 100 °C for 5 min. Subsequently, PDINN in methanol solutions (0.8 mg/mL) was spin-coated on the active layers at 3000 rpm for 40 s. Finally, Ag (110 nm) was thermally deposited as an electrode at a vacuum pressure of  $\sim 1 \times 10^{-4}$  Pa.

## Characterizations:

The absorption and transmission spectra were measured with an ultraviolet spectrometer (Shimadzu UV-1900i). Film thickness was measured by a Dektak XT probe profiler (produced by Bruker). Photovoltaic parameters and mechanical stability of ultrathin devices are tested in a nitrogen glove box. The  $J-V$  curve of the device was tested using a Keithley 2450 source measure unit under standard sunlight provided by a sunlight simulator (SS-X50, Enlitech). A metal mask with an area of 0.04 cm<sup>2</sup> was used to define the effective area of the devices. The measurements were conducted using a voltage scan range of -0.2 to 1.0 V. All photovoltaic parameters of devices are averaged over 20 devices. Mechanical stability of ultrathin OSCs is tested using an automated tensile-bending tester (PR-BDM4-100V). Mechanical stability of ultrathin OSCs is averaged over 8 devices. The light intensity was calibrated using a standard

silicon reference cell certified by the National Renewable Energy Laboratory (NREL, USA). The EQE was obtained using a solar cell spectral response measurement system (Enli Technology Co., Ltd., QE-R). The light intensity of the system is calibrated by the reference Si probe (RC-S103011-E) obtained from Enli Technology Co Ltd. TPC and TPV were measured using a transient photocurrent and photovoltage measurement system (LST-TPC, Shanghai Jinzhu Technology Co., Ltd.). The morphology of the films is characterized by atomic force microscope (AFM). Grazing-incidence wide-angle X-ray scattering (GIWAXS) patterns were measured using Xeuss 3.0 system. The 10 keV X-ray beam was incident at a grazing angle of  $0.15^\circ$ .

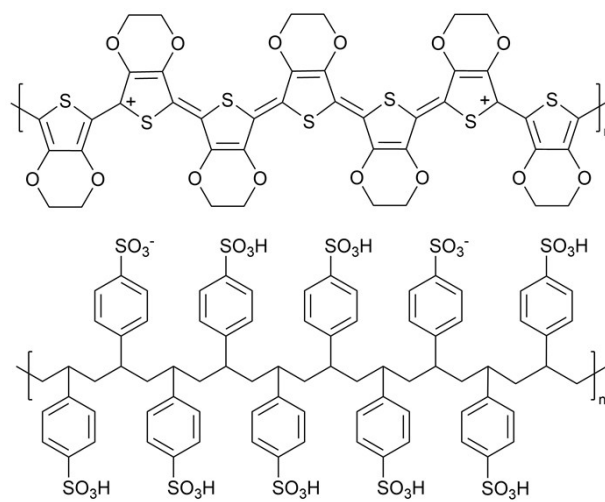

Figure S1. Chemical structure of PEDOT:PSS.

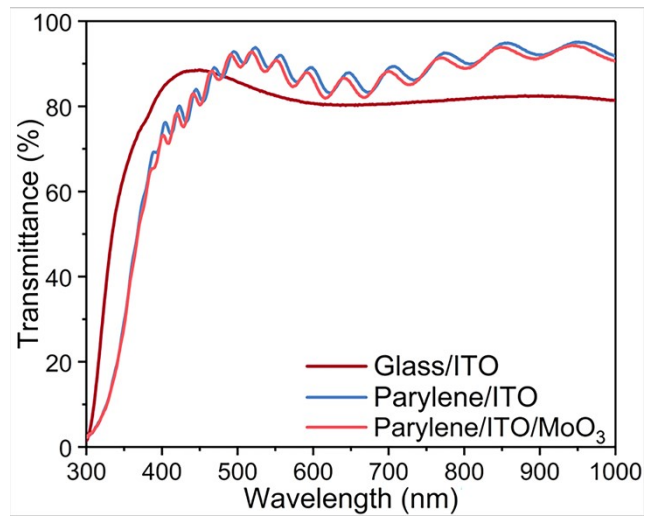

Figure S2. Transmittance spectra of glass/ITO, parylene/ITO and parylene/ITO/MoO<sub>3</sub>.

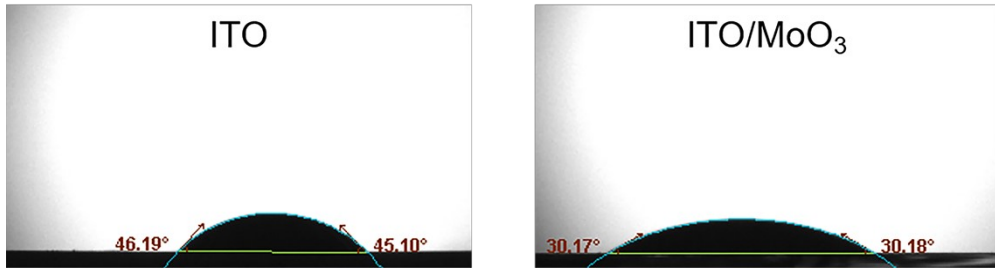

Figure S3. Contact angles for PEDOT:PSS on parylene/ITO and parylene/ITO/MoO<sub>3</sub> samples.

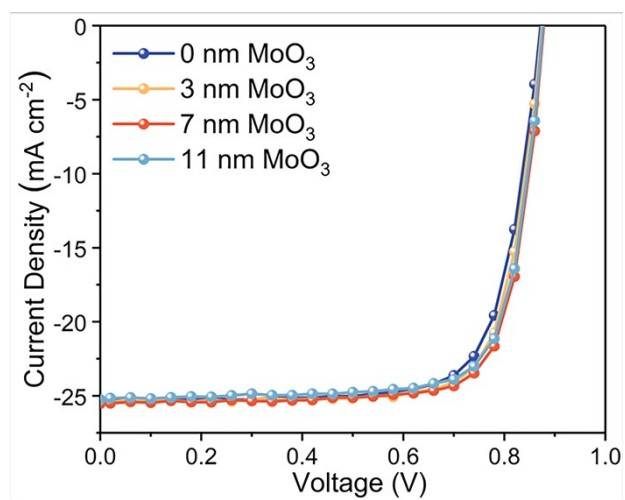

Figure S4.  $J$ - $V$  curves of PM6:L8-BO-based ultrathin OSCs with different MoO<sub>3</sub> thickness.

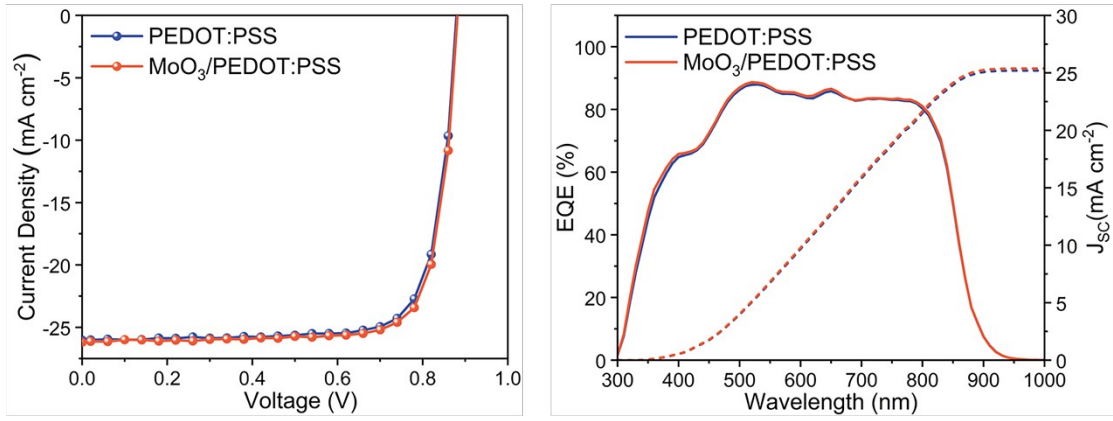

Figure S5.  $J$ - $V$  curves and EQE spectra of rigid PM6:L8-BO OSCs.



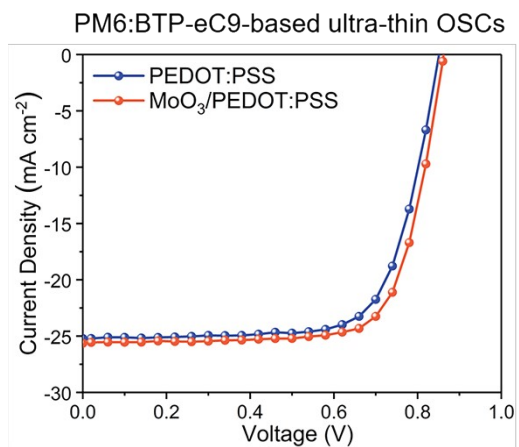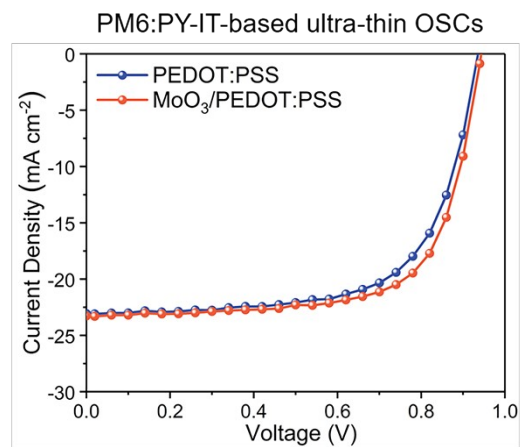

Figure S6.  $J$ - $V$  curves of PM6:BTP-eC9-based and PM6:PY-IT-based ultrathin OSCs.

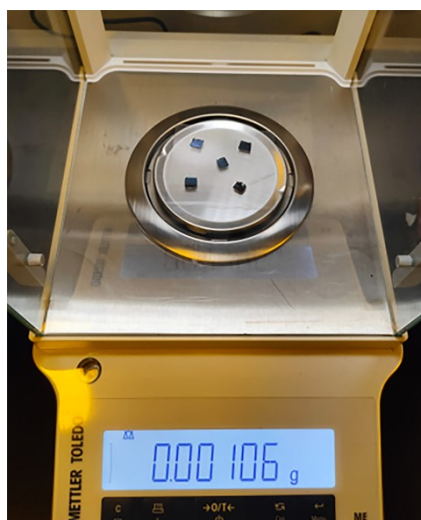

Figure S7. The weight of five 0.7 cm \* 0.7 cm ultrathin OSCs.

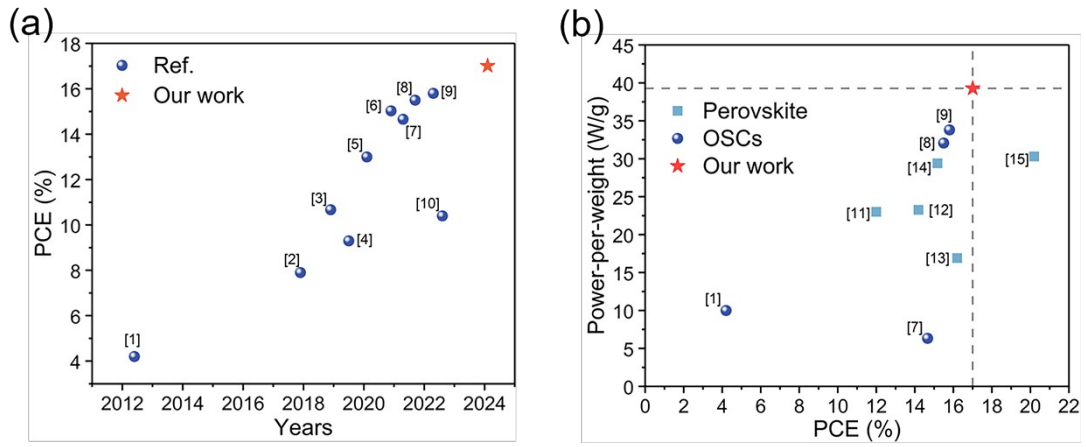

Figure S8. Summary of PCE and power-per-weight of bottom-illuminated ultrathin OSCs reported in previous literatures.

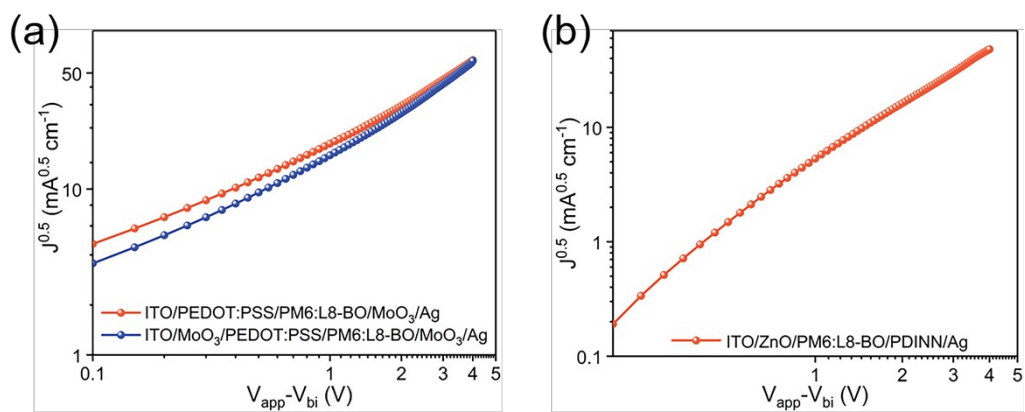

Figure S9.  $J^{0.5}$ - $V$  curves of the (a) hole-only and (b) electron-only devices.

MoO<sub>3</sub>/PEDOT:PSS-based ultra-thin OSCs

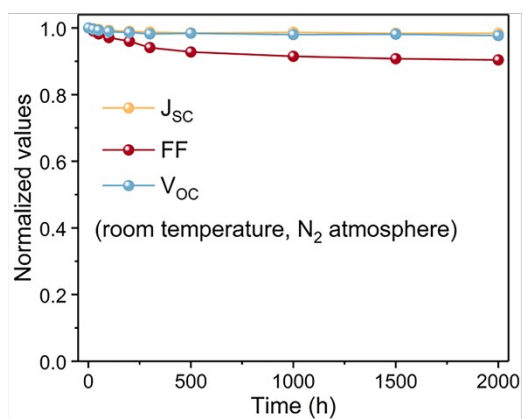

PEDOT:PSS-based ultra-thin OSCs

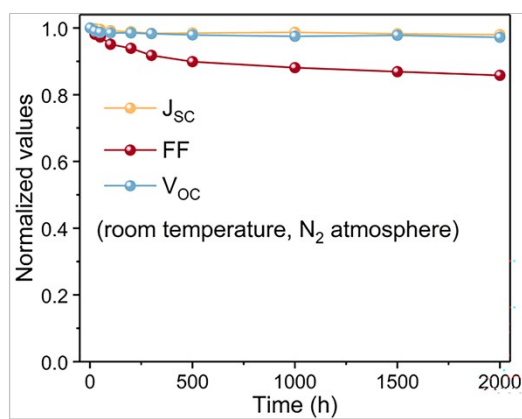

Figure S10. Evolution of  $V_{OC}$ ,  $J_{SC}$  and FF of ultrathin OSCs stored in N<sub>2</sub> at 25 °C under dark conditions: (a) MoO<sub>3</sub>/PEDOT:PSS-based OSCs and (b) PEDOT:PSS-based OSCs.

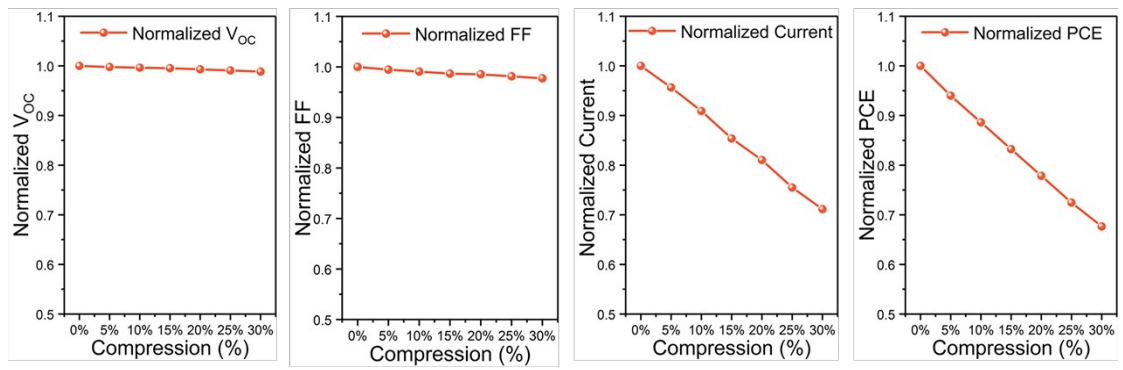

Figure S11. Trends of photovoltaic parameters of ultrathin OSCs at different compression rates.

Table S1. Photovoltaic parameters of PM6:L8-BO-based ultrathin OSCs with different MoO<sub>3</sub> thickness.

|                        | $V_{OC}$<br>[V]        | $J_{SC}$<br>[mA cm <sup>-2</sup> ] | FF<br>[%]          | PCE<br>[%]         |
|------------------------|------------------------|------------------------------------|--------------------|--------------------|
| 0 nm MoO <sub>3</sub>  | 0.879<br>(0.866±0.004) | 25.3<br>(25.1±0.2)                 | 74.4<br>(74.0±0.4) | 16.4<br>(16.1±0.3) |
| 3 nm MoO <sub>3</sub>  | 0.872<br>(0.868±0.004) | 25.4<br>(25.2±0.3)                 | 75.6<br>(75.1±0.5) | 16.7<br>(16.4±0.3) |
| 7 nm MoO <sub>3</sub>  | 0.873<br>(0.871±0.002) | 25.5<br>(25.3±0.3)                 | 76.4<br>(76.1±0.4) | 17.0<br>(16.7±0.3) |
| 11 nm MoO <sub>3</sub> | 0.873<br>(0.871±0.002) | 25.1<br>(24.9±0.3)                 | 76.2<br>(76.1±0.3) | 16.7<br>(16.5±0.2) |

Table S2. Photovoltaic parameters of PM6:L8-BO-based rigid OSCs with and without MoO<sub>3</sub> interlayer.

| HTL                             | $V_{OC}$<br>[V]        | $J_{SC}$<br>[mA cm <sup>-2</sup> ] | $J_{cal}$<br>[mA cm <sup>-2</sup> ] | FF<br>[%]          | PCE<br>[%]         |
|---------------------------------|------------------------|------------------------------------|-------------------------------------|--------------------|--------------------|
| PEDOT:PSS                       | 0.872<br>(0.871±0.003) | 26.0<br>(25.9±0.2)                 | 25.2                                | 78.1<br>(77.6±0.5) | 17.7<br>(17.5±0.2) |
| MoO <sub>3</sub> /PEDOT:PS<br>S | 0.879<br>(0.877±0.002) | 26.2<br>(26.0±0.2)                 | 25.4                                | 78.6<br>(78.3±0.4) | 18.1<br>(17.8±0.3) |

Table S3. Photovoltaic parameters of PM6:BTP-eC9-based and PM6:PY-IT-based ultrathin OSCs.

| Active layer    | HTL                             | $V_{OC}$<br>[V]        | $J_{SC}$<br>[mA cm <sup>-2</sup> ] | FF<br>[%]          | PCE<br>[%]         |
|-----------------|---------------------------------|------------------------|------------------------------------|--------------------|--------------------|
| PM6:BTP-<br>eC9 | PEDOT:PSS                       | 0.848<br>(0.847±0.002) | 25.2<br>(24.9±0.3)                 | 70.9<br>(70.6±0.4) | 15.2<br>(15.1±0.1) |
|                 | MoO <sub>3</sub> /PEDOT:PS<br>S | 0.859<br>(0.859±0.003) | 25.6<br>(25.4±0.2)                 | 72.7<br>(72.3±0.5) | 16.0<br>(15.8±0.2) |
| PM6:PY-IT       | PEDOT:PSS                       | 0.932<br>(0.931±0.002) | 23.2<br>(22.9±0.3)                 | 66.3<br>(66.1±0.4) | 14.3<br>(14.1±0.2) |
|                 | MoO <sub>3</sub> /PEDOT:PS<br>S | 0.940<br>(0.938±0.002) | 23.3<br>(23.0±0.3)                 | 68.8<br>(68.5±0.3) | 15.1<br>(15.0±0.1) |

Table S4.  $R_{series}$  and  $R_{shunt}$  of ultrathin OSCs with and without MoO<sub>3</sub> interlayer.

| HTL                         | $R_{series}$<br>[ $\Omega\text{cm}^2$ ] | $R_{shunt}$<br>[ $\Omega\text{cm}^2$ ] |
|-----------------------------|-----------------------------------------|----------------------------------------|
| PEDOT:PSS                   | 1.07                                    | $1.15 \times 10^7$                     |
| MoO <sub>3</sub> /PEDOT:PSS | 1.13                                    | $4.20 \times 10^7$                     |

Photovoltaic parameters of the best-performing ultrathin OSCs with a large area of 0.49 cm<sup>2</sup>.

| HTL                         | $V_{oc}$<br>[V]        | $J_{sc}$<br>[mA cm <sup>-2</sup> ] | FF<br>[%]          | PCE<br>[%]         |
|-----------------------------|------------------------|------------------------------------|--------------------|--------------------|
| PEDOT:PSS                   | 0.862<br>(0.861±0.002) | 25.1<br>(25.0±0.2)                 | 70.9<br>(70.6±0.4) | 15.3<br>(15.1±0.3) |
| MoO <sub>3</sub> /PEDOT:PSS | 0.872<br>(0.869±0.003) | 25.3<br>(25.1±0.2)                 | 74.8<br>(74.4±0.4) | 16.5<br>(16.3±0.2) |

Table S6. Photovoltaic parameters of stretchable OSCs with device area of 0.04 cm<sup>2</sup> at different compression rates.

| Compression (%) | $V_{oc}$<br>[V]        | Current<br>[mA]     | FF<br>[%]          | PCE<br>[%]         |
|-----------------|------------------------|---------------------|--------------------|--------------------|
| 0               | 0.873<br>(0.871±0.002) | 1.02<br>(1.01±0.01) | 76.0<br>(75.7±0.4) | 16.9<br>(16.7±0.2) |
| 5               | 0.871<br>(0.869±0.002) | 0.97<br>(0.97±0.01) | 75.5<br>(75.3±0.3) | 15.9<br>(15.7±0.2) |
| 10              | 0.870<br>(0.868±0.003) | 0.92<br>(0.92±0.01) | 75.2<br>(75.0±0.3) | 15.0<br>(14.8±0.3) |
| 15              | 0.869<br>(0.867±0.002) | 0.87<br>(0.86±0.01) | 74.8<br>(74.7±0.3) | 14.1<br>(13.9±0.2) |
| 20              | 0.867<br>(0.865±0.003) | 0.82<br>(0.82±0.01) | 74.7<br>(74.6±0.2) | 13.3<br>(13.0±0.3) |
| 25              | 0.864<br>(0.863±0.003) | 0.77<br>(0.76±0.01) | 74.5<br>(74.3±0.3) | 12.4<br>(12.1±0.3) |
| 30              | 0.862<br>(0.861±0.003) | 0.72<br>(0.72±0.01) | 74.3<br>(74.0±0.3) | 11.5<br>(11.3±0.3) |



Table S7. The statistical data for bottom-illuminated ultrathin solar cells.

| Type | Device structure                                                                  | PCE [%] | Power-per-weight [W/g] | Years    | Ref. |
|------|-----------------------------------------------------------------------------------|---------|------------------------|----------|------|
|      | PET/PEDOT:PSS/P3HT:PCBM/Ca/Ag                                                     | 4.2     | 10                     | 2012.4   | 1    |
|      | Parylene/ITO/ZnO/PNTz4T:PC <sub>71</sub> BM/MoO <sub>3</sub> /Ag                  | 7.9     | -                      | 2017.9   | 2    |
|      | Parylene/ITO/ZnO/PBDTTT-OFT:PC <sub>71</sub> BM/MoO <sub>3</sub> /Ag              | 10.67   | -                      | 2018.9   | 3    |
|      | PI/ITO/ZnO/PTzNTz-BOBO:PC <sub>71</sub> BM/MoO <sub>3</sub> /Ag                   | 9.3     | -                      | 2019.5   | 4    |
|      | Parylene/SU8/ITO/ZnO/PBDTTT-OFT:IEICO-4F:PC <sub>71</sub> BM/MoO <sub>3</sub> /Ag | 13.0    | -                      | 2020.1   | 5    |
| OSC  | PEN/AgNWs/PEI-Zn/PM6:Y6/MoO <sub>3</sub> /Ag                                      | 15.03   | -                      | 2020.9   | 6    |
|      | PE/PH1000/Al4083/PM6:Y6/PFN-Br/Al                                                 | 14.66   | 6.33                   | 2021.3   | 7    |
|      | PET/PH1000/PEDOT:PSS(4083)/D18-Cl:Y6:PC <sub>71</sub> BM/PFNDI-Br/Ag              | 15.5    | 32.07                  | 2021.7   | 8    |
|      | tPI/ITO/PEI-Zn/PM6:Y6/MoO <sub>3</sub> /Ag                                        | 15.8    | 33.80                  | 2022.3   | 9    |
|      | Parylene/ITO/ZnO/PBDTTT-OFT:IEICO-4F/PEDOT:PSS/Ag                                 | 10.4    | -                      | 2022.6   | 10   |
|      | Parylene/ITO/MoO <sub>3</sub> /PEDOT:PSS/PM6:L8-BO/PDINN/Ag                       | 17.01   | 39.3                   | Our work |      |
|      | PET/PEDOT:PSS/Perovskite/PTCDI Cr <sub>2</sub> O <sub>3</sub> /Au                 | 12.0    | 23.0                   | 2015.9   | 11   |
|      | PET/ITO/NiOx/Perovskite/C60/Bis-C60/Ag                                            | 14.19   | 23.26                  | 2017.4   | 12   |
| PSC  | PET/ITO/NiOx/R-BA/Perovskite/PCBM/Bis-C60/Ag                                      | 16.2    | 16.9                   | 2017.9   | 13   |
|      | PEN/AgNWs/PH1000/Al4083/Perovskite/PC <sub>61</sub> BM/Al                         | 15.18   | 29.4                   | 2019.1   | 14   |
|      | Parylene/ITGZO/PTAA/Perovskite/PCBM/BCP/Cu                                        | 20.2    | 30.3                   | 2022.9   | 15   |

## Reference

- 1 M. Kaltenbrunner, M. S. White, E. D. Głowacki, T. Sekitani, T. Someya, N. S. Sariciftci and S. Bauer, *Nat. Commun.*, 2012, **3**, 770.
- 2 H. Jinno, K. Fukuda, X. Xu, S. Park, Y. Suzuki, M. Koizumi, T. Yokota, I. Osaka, K. Takimiya and T. Someya, *Nat. Energy*, 2017, **2**, 780–785.
- 3 S. Park, S. W. Heo, W. Lee, D. Inoue, Z. Jiang, K. Yu, H. Jinno, D. Hashizume, M. Sekino, T. Yokota, K. Fukuda, K. Tajima and T. Someya, *Nature*, 2018, **561**, 516–521.
- 4 H. Kimura, K. Fukuda, H. Jinno, S. Park, M. Saito, I. Osaka, K. Takimiya, S. Umezu and T. Someya, *Adv. Mater.*, 2019, **31**, 1808033.
- 5 W. Huang, Z. Jiang, K. Fukuda, X. Jiao, C. R. McNeill, T. Yokota and T. Someya, *Joule*, 2020, **4**, 128–141.
- 6 F. Qin, W. Wang, L. Sun, X. Jiang, L. Hu, S. Xiong, T. Liu, X. Dong, J. Li, Y. Jiang, J. Hou, K. Fukuda, T. Someya and Y. Zhou, *Nat. Commun.*, 2020, **11**, 4508.
- 7 J. Wan, R. Wen, Y. Xia, M. Dai, H. Huang, L. Xue, Z. Zhang, J. Fang, K. N. Hui and X. Fan, *J. Mater. Chem. A*, 2021, **9**, 5425–5433.
- 8 W. Song, K. Yu, E. Zhou, L. Xie, L. Hong, J. Ge, J. Zhang, X. Zhang, R. Peng and Z. Ge, *Adv. Funct. Mater.*, 2021, **31**, 2102694.
- 9 S. Xiong, K. Fukuda, S. Lee, K. Nakano, X. Dong, T. Yokota, K. Tajima, Y. Zhou and T. Someya, *Adv. Sci.*, 2022, **9**, 2105288.
- 10 S. I. Rich, S. Lee, K. Fukuda and T. Someya, *Adv. Mater.*, 2022, **34**, 2106683.
- 11 M. Kaltenbrunner, G. Adam, E. D. Głowacki, M. Drack, R. Schwödiauer, L. Leonat, D. H. Apaydin, H. Groiss, M. C. Scharber, M. S. White, N. S. Sariciftci and S. Bauer, *Nat. Mater.*, 2015, **14**, 1032–1039.
- 12 H. Zhang, J. Cheng, D. Li, F. Lin, J. Mao, C. Liang, A. K.-Y. Jen, M. Grätzel and W. C. H. Choy, *Adv. Mater.*, 2017, **29**, 1604695.
- 13 Q. Wang, C.-C. Chueh, T. Zhao, J. Cheng, M. Eslamian, W. C. H. Choy and A. K.-Y. Jen, *ChemSusChem*, 2017, **10**, 3794–3803.
- 14 S. Kang, J. Jeong, S. Cho, Y. J. Yoon, S. Park, S. Lim, J. Y. Kim and H. Ko, *J. Mater. Chem. A*, 2019, **7**, 1107–1114.
- 15 J. Wu, P. Chen, H. Xu, M. Yu, L. Li, H. Yan, Y. Huangfu, Y. Xiao, X. Yang, L. Zhao, W. Wang, Q. Gong and R. Zhu, *Sci. China Mater.*, 2022, **65**, 2319–2324.
